# Supplementary material
Source: PubMed Central journal article supplement (PMC8554655)
Supplement: MCO2-2-442-s001.pdf [file MCO2-2-442-s001.pdf]

## **Potent neutralizing RBD-specific antibody cocktail against SARS-CoV-2 and its mutant**

Lina Jia <sup>1,#</sup> | Yan-Ping Liu <sup>2,#</sup> | Li-Fei Tian <sup>2</sup> | Chao Xiong <sup>1</sup> | Xin Xu <sup>1</sup> | Honge Qu <sup>1</sup> | Weixi Xiong <sup>1</sup> | Dong Zhou <sup>1</sup> | Feng Wang <sup>4</sup> | Zheng Liu <sup>3</sup> | Xiao-Xue Yan <sup>2,\*</sup> | Wenqing Xu <sup>2,5,\*</sup> | Lin Tang <sup>1,\*</sup>

<sup>1</sup> Department of Neurology, State Key Lab of Biotherapy and Cancer center, West China Hospital, Sichuan University and Collaborative Innovation Center for Biotherapy, Chengdu, 610041 Sichuan, China;

<sup>2</sup> National Laboratory of Biomacromolecules, Chinese Academy of Sciences (CAS) Center for Excellence in Biomacromolecules, Institute of Biophysics, Chinese Academy of Sciences, 100101 Beijing, China;

<sup>3</sup> School of life and health, Kobilka Institute of Innovative Drug Discovery, the Chinese University of Hong Kong (Shenzhen), China;

<sup>4</sup> Wuxi Biortus Biosciences Co. Ltd., 6 Dongsheng West Road, Jiangyin, 214437, China;

<sup>5</sup> Shanghai Institute for Advanced Immunochemical Studies and School of Life Science and Technology, ShanghaiTech University, Shanghai, China.

\*Correspondence: Xiao-Xue Yan ([snow@ibp.ac.cn](mailto:snow@ibp.ac.cn)) or Wenqing Xu ([xuwq2@shanghaitech.edu.cn](mailto:xuwq2@shanghaitech.edu.cn)) or Lin Tang ([ltang@scu.edu.cn](mailto:ltang@scu.edu.cn)) .

#These authors contributed equally: Lina Jia, Yan-Ping Liu.

Keywords: SARS-CoV-2, receptor-binding domain, neutralizing antibody, cocktail, epitopes group, Cryo-EM

# SUPPORTING MATERIALS

## 1 | MATERIALS AND METHODS

### 1.1 | In vitro expression of mAbs

The genes encoding the heavy and light chains of the identified antibodies were separately cloned into expression vectors containing IgG1 constant regions, and the vectors were transiently transfected into 293F cells using polyethylenimine (Sigma). After 72 h, the antibodies secreted into the supernatant were collected and captured by protein A Sepharose (GE Healthcare). The bound antibodies were eluted and further purified by gel filtration chromatography using a Superdex 200 high-performance column (GE Healthcare). The purified antibodies were either used in binding or neutralizing assays.

### 1.2 | ELISA analysis

ELISA plates were coated with SARS-CoV-2 RBD and S protein at 0.5  $\mu\text{g}/\text{mL}$  in phosphate-buffered saline at 4°C overnight. After standard washing and blocking, 100  $\mu\text{L}$  antibody dilution or supernatant of hybridoma clone was added to each well. After 2 h incubation at room temperature, the plates were washed and incubated with 0.08  $\mu\text{g}/\text{mL}$  goat anti-human IgG (H + L)/horseradish peroxidase (HRP) for 1 h at room temperature. The reaction was visualized by adding the substrate 3,3',5,5'-tetramethylbenzidine (TMB). Absorbance at 450 nm was measured using an ELISA plate reader.

An ELISA plate was coated with recombinant RBD-His at 1  $\mu\text{g}/\text{mL}$  and then treated for 1 h at 37°C with 10 mM DTT followed by washing to determine the effect of disulfide bond reduction on the binding of RBD-specific mAbs. Then, the wells were treated with 50 mM iodoacetamide for 1 h at 37°C. After washing, standard ELISA was performed as described above.

Competitive ELISA was performed to determine the inhibitory activity of RBD-specific mAbs on the binding of biotinylated mAbs to RBD. Briefly, the wells of ELISA plates were coated with the RBD-His tag at 1  $\mu\text{g}/\text{mL}$ . A mixture containing 50  $\mu\text{g}/\text{mL}$  unlabeled mAb and

1 µg/mL biotinylated mAb was added, followed by incubation at 37°C for 1 h. The binding of biotinylated mAbs was detected after adding HRP-conjugated streptavidin (Zymed Laboratories) and TMB sequentially.

### **1.3 | Epitope binding by SPR**

For epitope mapping, two different antibodies were sequentially injected and monitored for binding activity using SPR (Biacore T100; GE Healthcare). The sensorgrams showed distinct binding patterns when pairs of testing antibodies were sequentially applied to the purified SARS-CoV-2 RBD or SARS-CoV-2 RBD<sub>V367F</sub> covalently immobilized onto a CM5 sensor chip. SARS-CoV-2 RBD or SARS-CoV-2 RBD<sub>V367F</sub> was immobilized to a CM5 sensor chip via amine group for a final RU of approximately 1500. The first antibodies were injected onto the chip until a binding steady state was reached, and the second antibodies were then injected for 180 s. The level of reduction in RU comparing with or without prior antibody incubation is the key criterion to determine that the two mAbs recognize separate or closely situated epitopes.

### **1.4 | Pseudovirus neutralization assays**

SARS-CoV-2 and its mutant SARS-CoV-2(V367F) pseudovirus were generated by co-transfection of HIV backbones expressing firefly luciferase (pNL43R-E-luciferase) and pcDNA3.1 (Invitrogen) expression vectors encoding the respective S and S<sub>V367F</sub> proteins into 293T cells (American Type Culture Collection). Viral supernatants were collected 48 h later. Viral titers were measured as luciferase activity in relative light units (Bright-Glo Luciferase Assay Vector System; Promega Biosciences). Neutralization assays were performed by incubating pseudoviruses with serial dilutions of purified mAbs or mAb cocktails at 37°C for 1 h. Cells for SARS-CoV-2 and SARS-CoV-2 pseudovirus (~15,000 per well) were added in duplicate to the virus–antibody mixture. The IC<sub>50</sub> of the evaluated mAbs was determined by luciferase activity 48 h after exposure to the virus–antibody mixture using GraphPad Prism 7 (GraphPad Software).

### **1.5 | Live SARS-CoV-2 neutralization assay**

A neutralization assay of live SARS-CoV-2 was performed using the cytopathic effect (CPE) assay. Briefly, threefold serial dilutions of mAbs were mixed with a volume of 100 PFU authentic SARS-CoV-2 and incubated at 37°C for 1 h. The mixture was added to a monolayer of Vero-E6 cells in a 96-well plate and incubated for 1 h at 37°C. The supernatant was removed, and 200  $\mu$ L Dulbecco's modified Eagle's medium (supplied with 3% fetal bovine serum) was added to the infected cells. After incubation at 37°C supplied with 5% CO<sub>2</sub> for 3 days, all wells were examined for the CPE effect. All experiments were performed in a Biosafety Level 3 facility.

## **1.6 | Cryo-EM sample preparation and data collection**

Three microliters of the MA1ScFv/MA2Fab/MA5Fab/RBD<sub>V367F</sub> complex (0.6 mg/mL) were loaded onto a freshly glow discharge (50 s at 20 mA) 1.2/1.3 UltrAuFoil (300 mesh) before plunge freezing using a vitrobot MarkIV (Thermo Fisher Scientific) with a blot force of 0 and 6 s blot time at 100% humidity at 22°C.

Data were acquired on an FEI Titan Krios transmission electron microscope operated at 300 kV and equipped with a Gatan K2 Summit direct detector and Gatan Quantum GIF energy filter. Movies were collected using SerialEM automated data collection software at a magnification of  $\times 22,500$  with a pixel size of 1.02 Å. The dose rate was adjusted to 8 counts/pixel/s, and each movie was fractioned in 40 frames of 200 ms. Three thousand micrographs were collected with a defocus range between  $-0.5$  and  $-3.0$   $\mu$ m.

2 | FIGURES AND TABLES

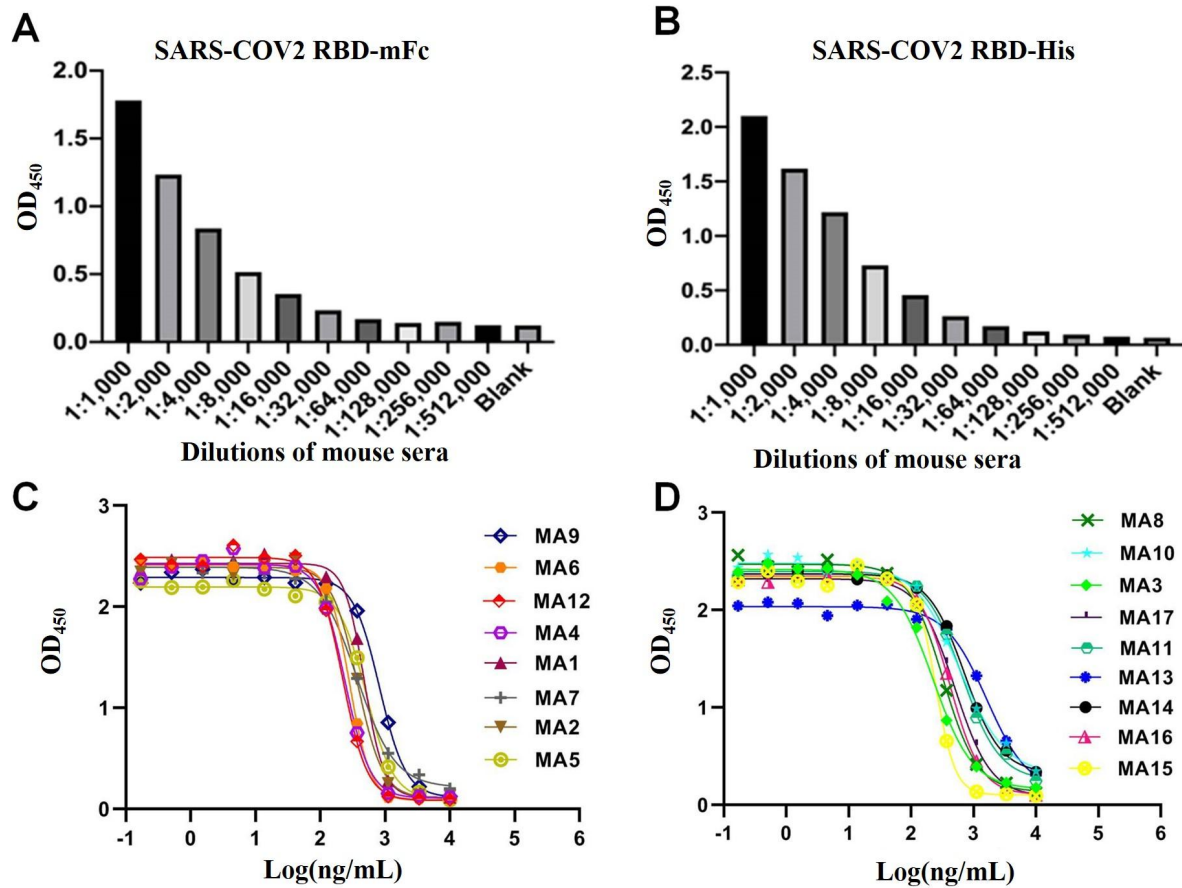

**Fig. (S1). Serological responses to the SARS-CoV-2 RBD and identification of 17 RBD-specific mAbs that inhibit binding of the RBD to ACE2.** (A,B) Serological antibody responses to the RBD-mFc and RBD-His. The plasma sample from mice six times after vaccination with RBD-mFc was evaluated for binding to the RBD coated on the ELISA plates. (C,D) Inhibitory curves of each mAb competing with ACE2 binding.

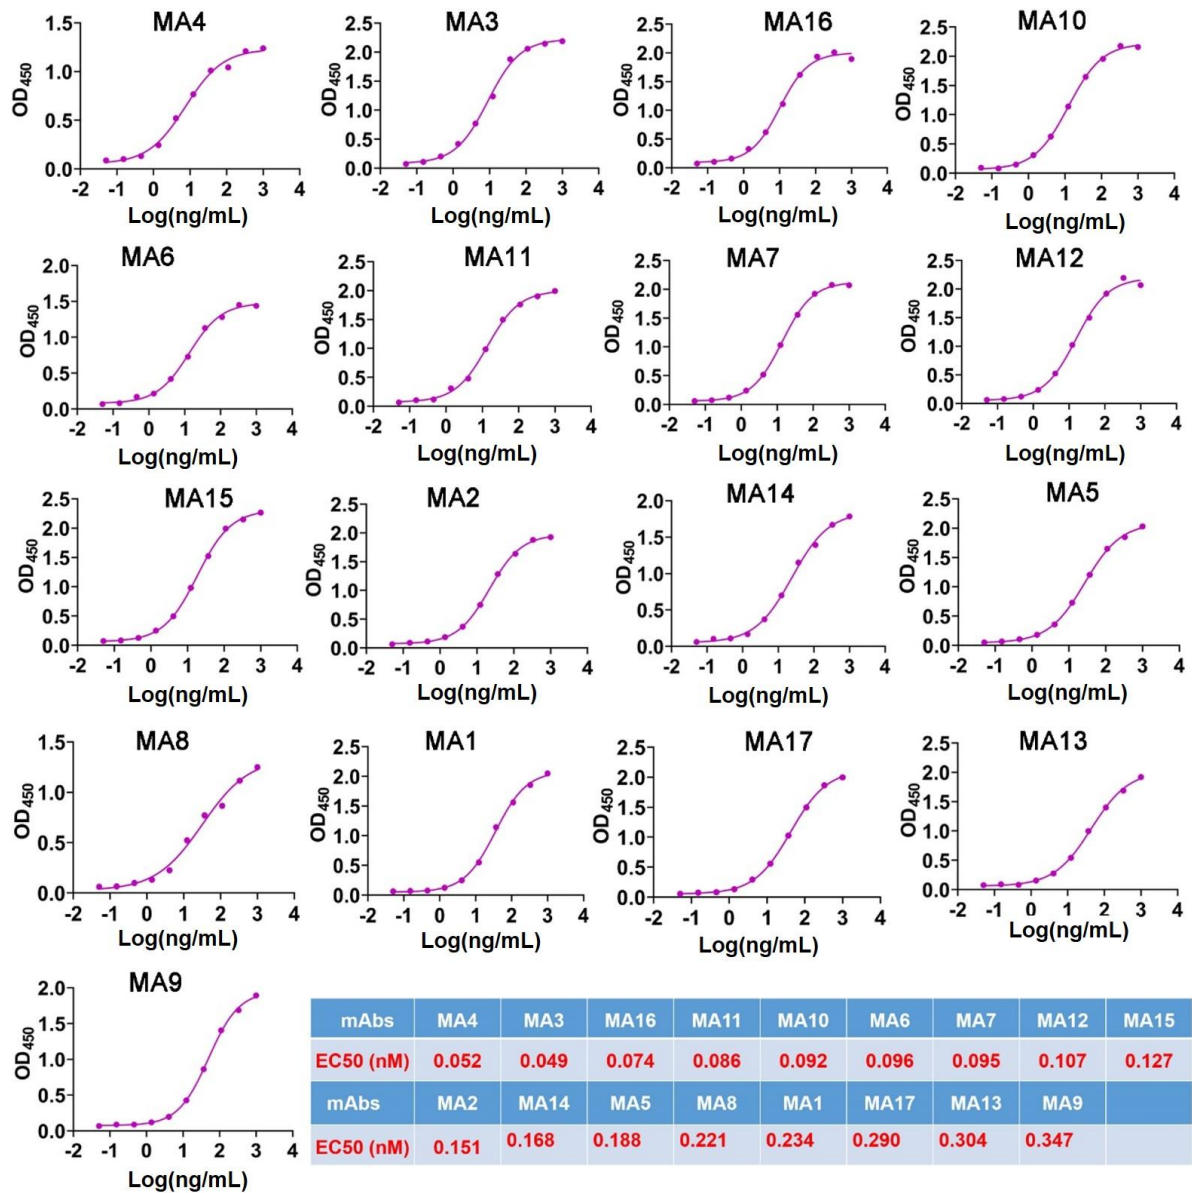

**Fig. (S2). Binding activities of RBD-specific mAbs to SARS-CoV-2 RBD by ELISA.** Purified mAbs are applied to ELISA plates coated with trimeric RBD to measure the binding activity.

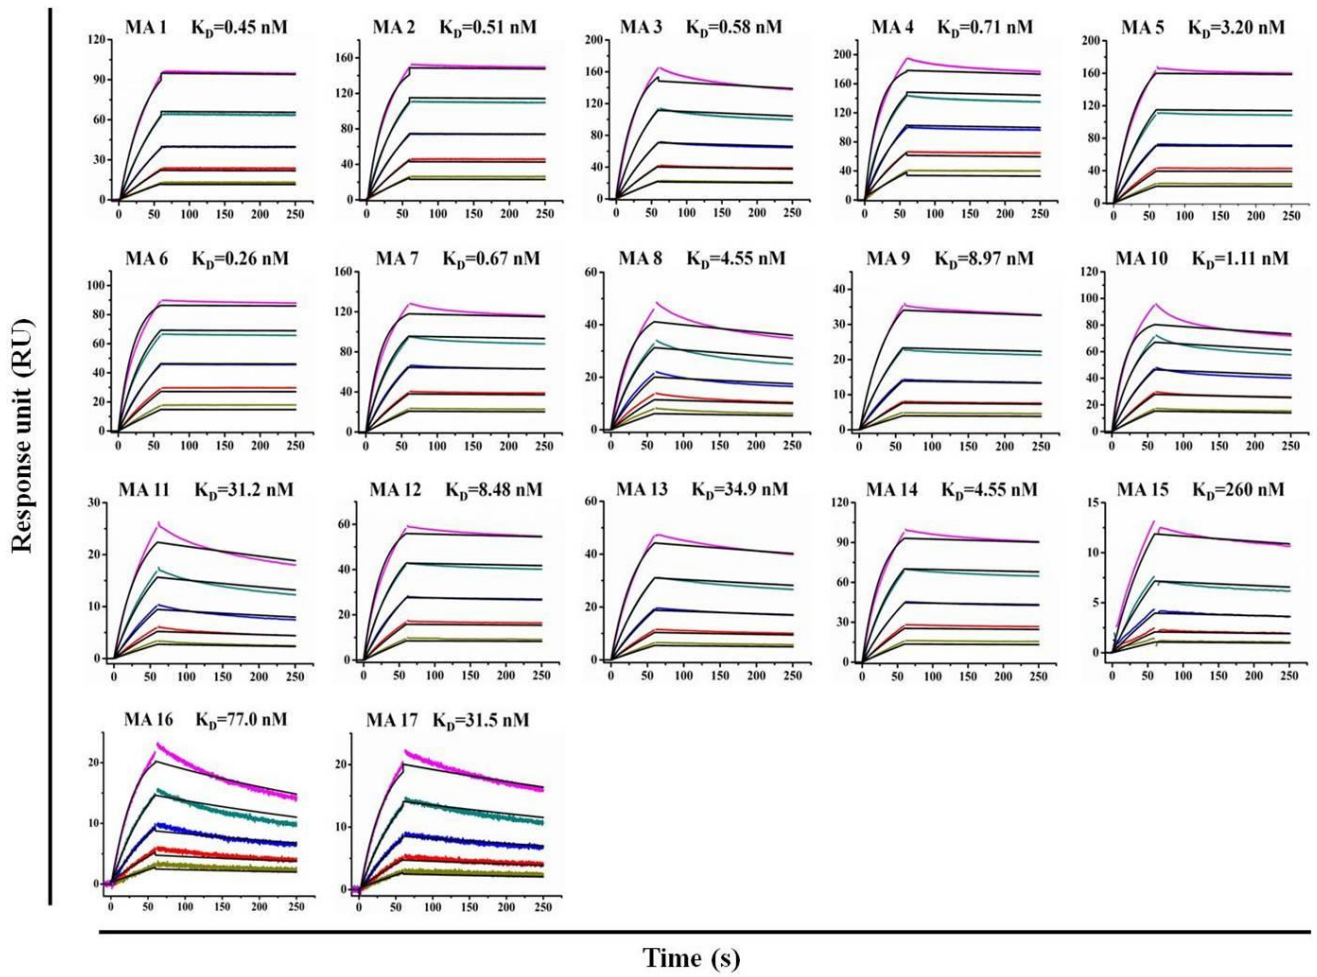

**Fig. (S3). Binding kinetics of RBD-specific mAbs with SARS-CoV-2 RBD.** The purified soluble SARS-CoV-2 RBD was covalently immobilized onto a CM5 sensor chip followed by injection of each antibody with five different concentrations. The black line indicates the experimentally derived curves, and the red lines represent the fitted curves based on the experimental data.

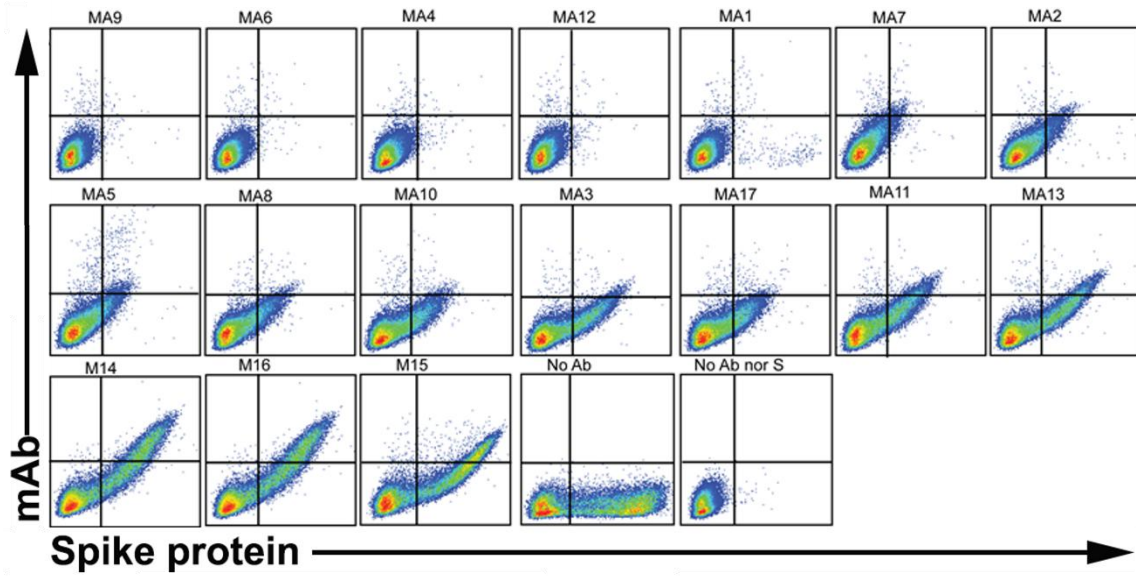

**Fig. (S4). Inhibition of S protein binding to human ACE2 overexpressing on 293T cells determined by flow cytometry.** After preincubation of S protein with the indicated mAb at a final concentration of 10  $\mu\text{g}/\text{mL}$ , the mAb-S mixture was added to the ACE2-expressing cells. Cells were stained with anti-human IgG FITC (mAb binding;  $x$ -axis) and anti-His (S binding;  $y$ -axis). One representative of three experiments is shown.



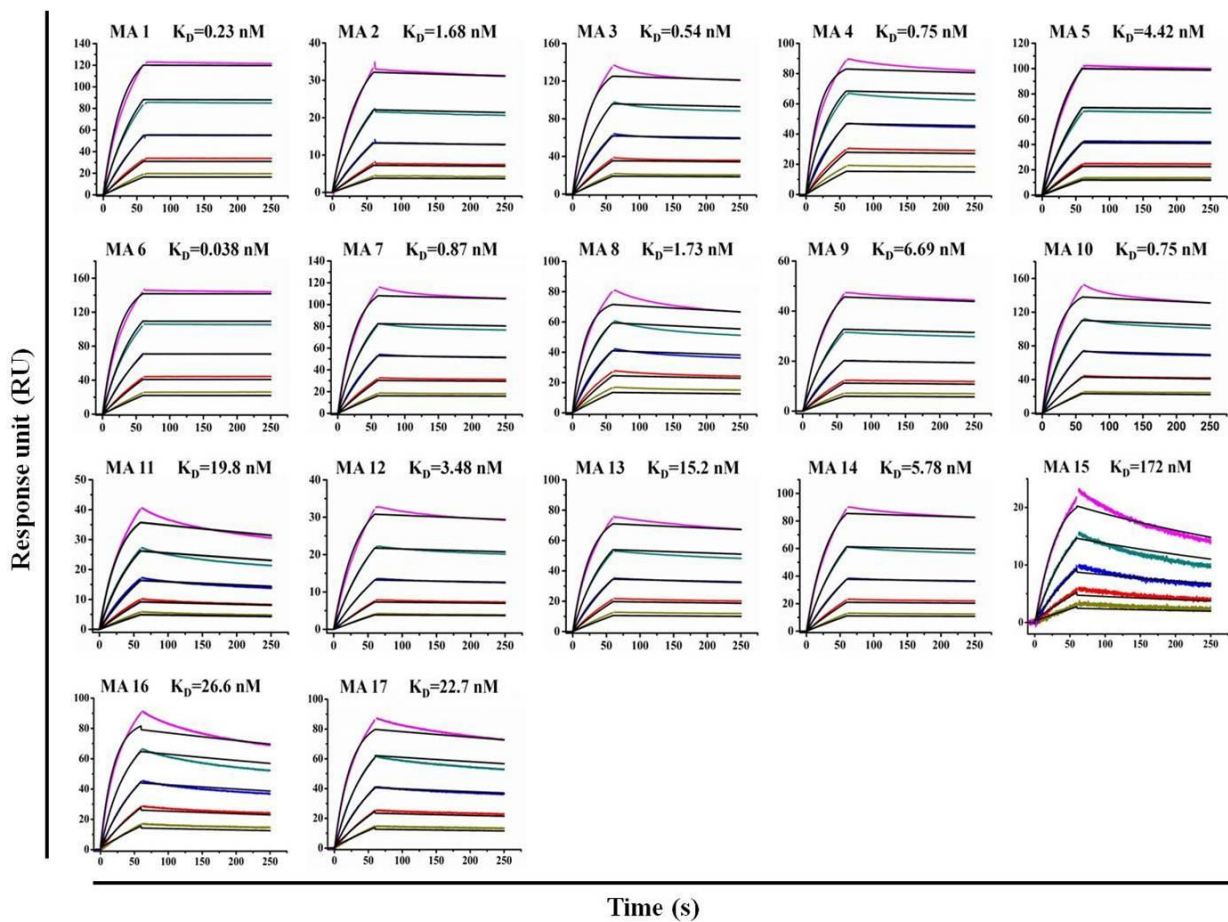

**Fig. (S5).** Binding kinetics of RBD-specific mAbs with SARS-CoV-2 RBD<sub>V367F</sub>. The purified soluble SARS-CoV-2 RBD<sub>V367F</sub> was covalently immobilized onto a CM5 sensor chip followed by injection of each antibody with five different concentrations. The black line indicates the experimentally derived curves, and the colored lines represent the fitted curves based on the experimental data.

| Group | mAbs | MA1  | MA9  | MA4  | MA3  | MA2  | MA8  | MA7  | MA10 | MA11 | MA14 | MA13 | MA6  | MA12 | MA15 | MA5  | MA16  | MA17 |
|-------|------|------|------|------|------|------|------|------|------|------|------|------|------|------|------|------|-------|------|
| I     | MA1  | 77.5 | 74.8 | 33.1 | 10.0 | 23.7 | 31.3 | 15.8 | 22.9 | 32.2 | 44.0 | 68.4 | 27.3 | 50.4 | 45.3 | 7.8  | -6.1  | 15.6 |
| II    | MA9  | 62.9 | 76.0 | 56.9 | 75.2 | 85.7 | 85.7 | 83.0 | 93.6 | 87.7 | 93.5 | 75.9 | 31.8 | 62.9 | 64.2 | 12.3 | 9.2   | 14.8 |
| II    | MA4  | 32.5 | 92.4 | 85.9 | 95.3 | 93.4 | 95.0 | 95.1 | 95.7 | 89.6 | 95.7 | 95.6 | 71.0 | 55.6 | 49.7 | 19.8 | 15.0  | 13.9 |
| II    | MA3  | 13.8 | 82.8 | 56.8 | 87.9 | 84.0 | 91.8 | 91.1 | 92.0 | 94.1 | 94.4 | 84.9 | 38.0 | 44.6 | 42.9 | 3.7  | -14.0 | 32.3 |
| II    | MA2  | 19.8 | 82.9 | 76.3 | 92.1 | 89.4 | 94.1 | 94.2 | 93.2 | 94.3 | 95.9 | 91.8 | 46.7 | 60.7 | 64.5 | -5.7 | -1.3  | 16.0 |
| II    | MA8  | 8.7  | 78.7 | 59.6 | 88.4 | 76.0 | 89.3 | 87.5 | 92.7 | 92.9 | 94.6 | 86.1 | 25.6 | 41.4 | 40.5 | 4.3  | 0.6   | 4.3  |
| II    | MA7  | 4.7  | 70.5 | 44.7 | 83.6 | 69.0 | 85.7 | 87.2 | 95.2 | 91.2 | 94.2 | 76.5 | 21.5 | 40.8 | 40.2 | -4.3 | 2.3   | -8.6 |
| II    | MA10 | 13.9 | 69.0 | 53.1 | 85.9 | 78.4 | 90.0 | 88.6 | 95.0 | 92.8 | 95.0 | 68.0 | 32.3 | 44.3 | 42.5 | 11.7 | -8.0  | 22.4 |
| II    | MA11 | 6.4  | 62.4 | 27.9 | 62.5 | 59.5 | 75.5 | 70.4 | 93.5 | 84.0 | 90.4 | 54.4 | 16.8 | 37.0 | 34.0 | 12.6 | 6.0   | 19.9 |
| II    | MA14 | 18.3 | 67.9 | 41.8 | 78.3 | 63.1 | 81.4 | 74.5 | 94.1 | 88.4 | 92.7 | 62.1 | 20.3 | 37.6 | 35.7 | 19.5 | 11.3  | 21.6 |
| II    | MA13 | 7.0  | 28.9 | 11.9 | 36.5 | 33.2 | 50.0 | 47.1 | 86.5 | 63.0 | 94.2 | 72.5 | 15.0 | 23.1 | 24.5 | 11.0 | -1.5  | 21.6 |
| III   | MA6  | 89.9 | 91.7 | 90.2 | 93.9 | 93.1 | 95.8 | 95.5 | 96.3 | 96.4 | 94.9 | 95.3 | 88.4 | 90.1 | 92.9 | 86.0 | 90.4  | 26.3 |
| III   | MA12 | 65.1 | 71.3 | 39.7 | 72.8 | 74.0 | 81.4 | 82.4 | 93.8 | 89.4 | 93.2 | 79.0 | 28.4 | 76.6 | 77.3 | 60.6 | 74.6  | 61.4 |
| III   | MA15 | 65.8 | 89.9 | 52.0 | 77.7 | 83.1 | 87.9 | 89.7 | 95.3 | 92.8 | 94.1 | 89.1 | 60.4 | 89.6 | 89.6 | 65.0 | 89.3  | 66.7 |
| IV    | MA5  | 17.0 | 25.8 | 30.6 | 26.2 | 13.2 | 29.7 | 41.6 | 49.5 | 41.0 | 55.8 | 24.1 | 39.0 | 82.9 | 76.8 | 61.5 | 76.4  | 70.3 |
| IV    | MA16 | 8.8  | 38.8 | 40.2 | 26.3 | 39.1 | 31.4 | 36.5 | 27.6 | 38.9 | 63.9 | 21.7 | 19.7 | 52.5 | 50.7 | 42.0 | 59.1  | 55.9 |
| IV    | MA17 | 11.5 | 15.3 | 31.2 | 21.9 | 16.3 | 25.8 | 21.3 | 43.8 | 20.8 | 41.2 | 15.8 | 10.6 | 51.4 | 52.1 | 52.4 | 53.0  | 78.7 |

**Fig. (S6). Epitope mapping through competitive binding measured by ELISA and SPR.**

His-tagged SARS-CoV-2 RBD was coated onto ELISA plates, and the unlabeled antibody (column) was applied in the presence of each biotinylated antibody (row). The percent reduction of biotinylated antibody binding to RBD was measured as the inhibitory rates shown in this Table.

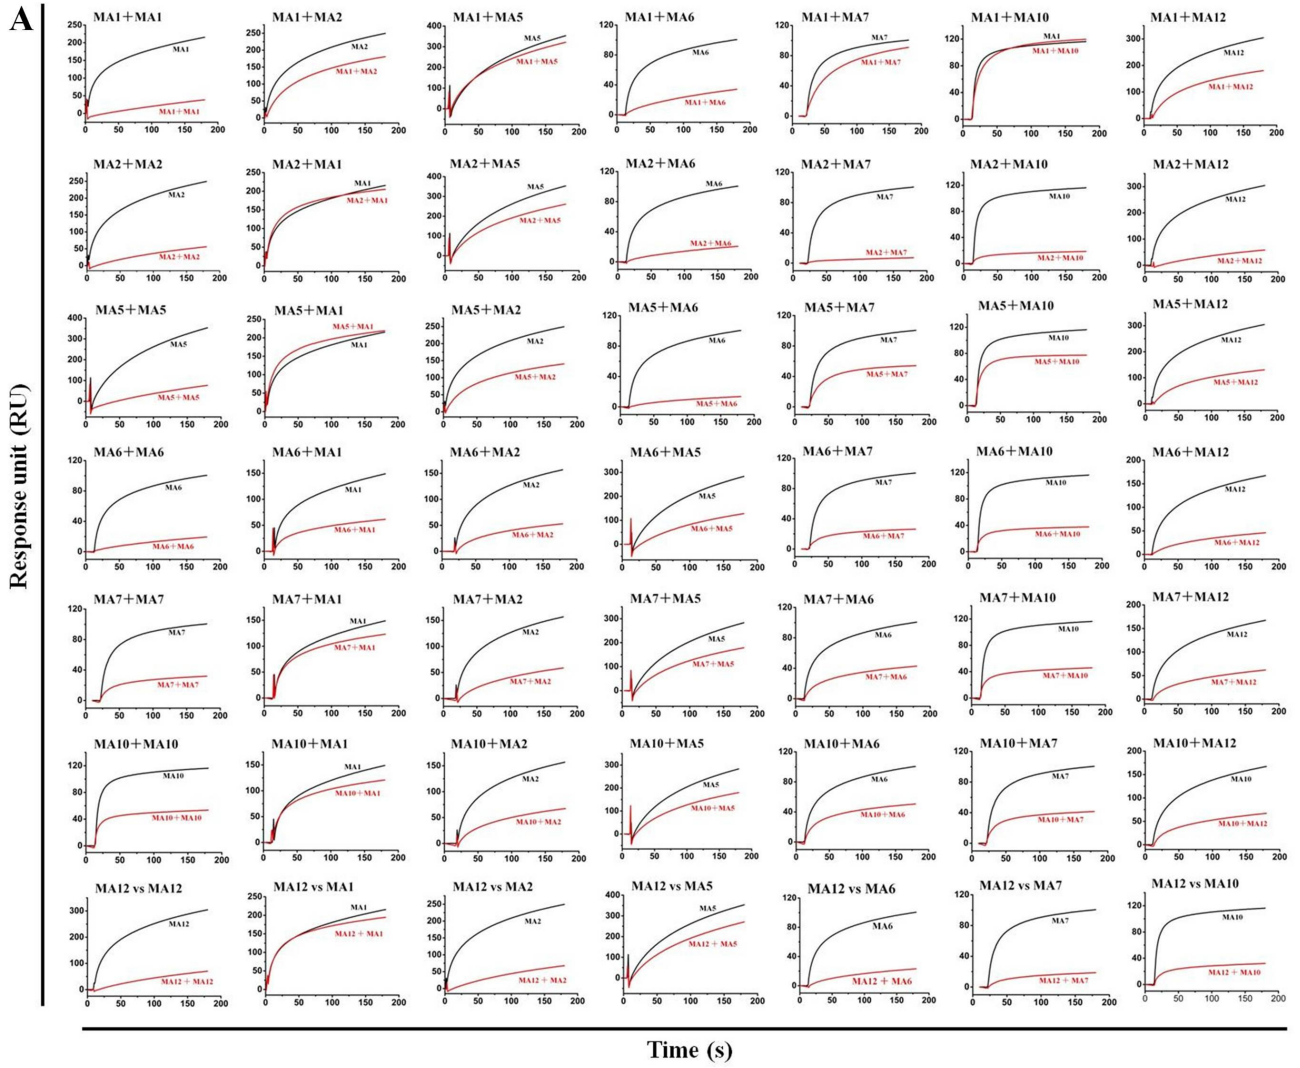

**B**

| mAbs | MA1 | MA2 | MA5 | MA6 | MA7 | MA10 | MA12 |
|------|-----|-----|-----|-----|-----|------|------|
| MA1  |     | —   | —   | ++  | —   | —    | +    |
| MA2  | —   |     | —   | +++ | +++ | +++  | +++  |
| MA5  | —   | +   |     | +++ | +   | +    | +    |
| MA6  | ++  | +++ | ++  |     | ++  | ++   | ++   |
| MA7  | —   | ++  | +   | ++  |     | ++   | ++   |
| MA10 | —   | ++  | +   | ++  | ++  |      | ++   |
| MA12 | —   | ++  | —   | ++  | +++ | ++   |      |

**Fig. (S7).** mAb epitope mapping through competitive binding measured by SPR. (A) The sensorgrams showed distinct binding patterns when pairs of testing antibodies were

sequentially applied to the purified SARS-CoV-2 RBD covalently immobilized onto a CM5 sensor chip. The level of reduction in RU comparing with or without prior mAb incubation is the key criterion to determine two mAbs that recognize separate or closely situated epitopes. Results are representative of two independent experiments. (B) For epitope mapping, the summary of the mentioned competition in Extended Data Figure 4 is as follows: “+++,” >80% competition among same epitopes; “++,” 50%–80% overlapping epitopes; “+,” 25% to 50% overlapping epitopes; and “-,” <25% distinct epitopes.

**A****Response unit (RU)**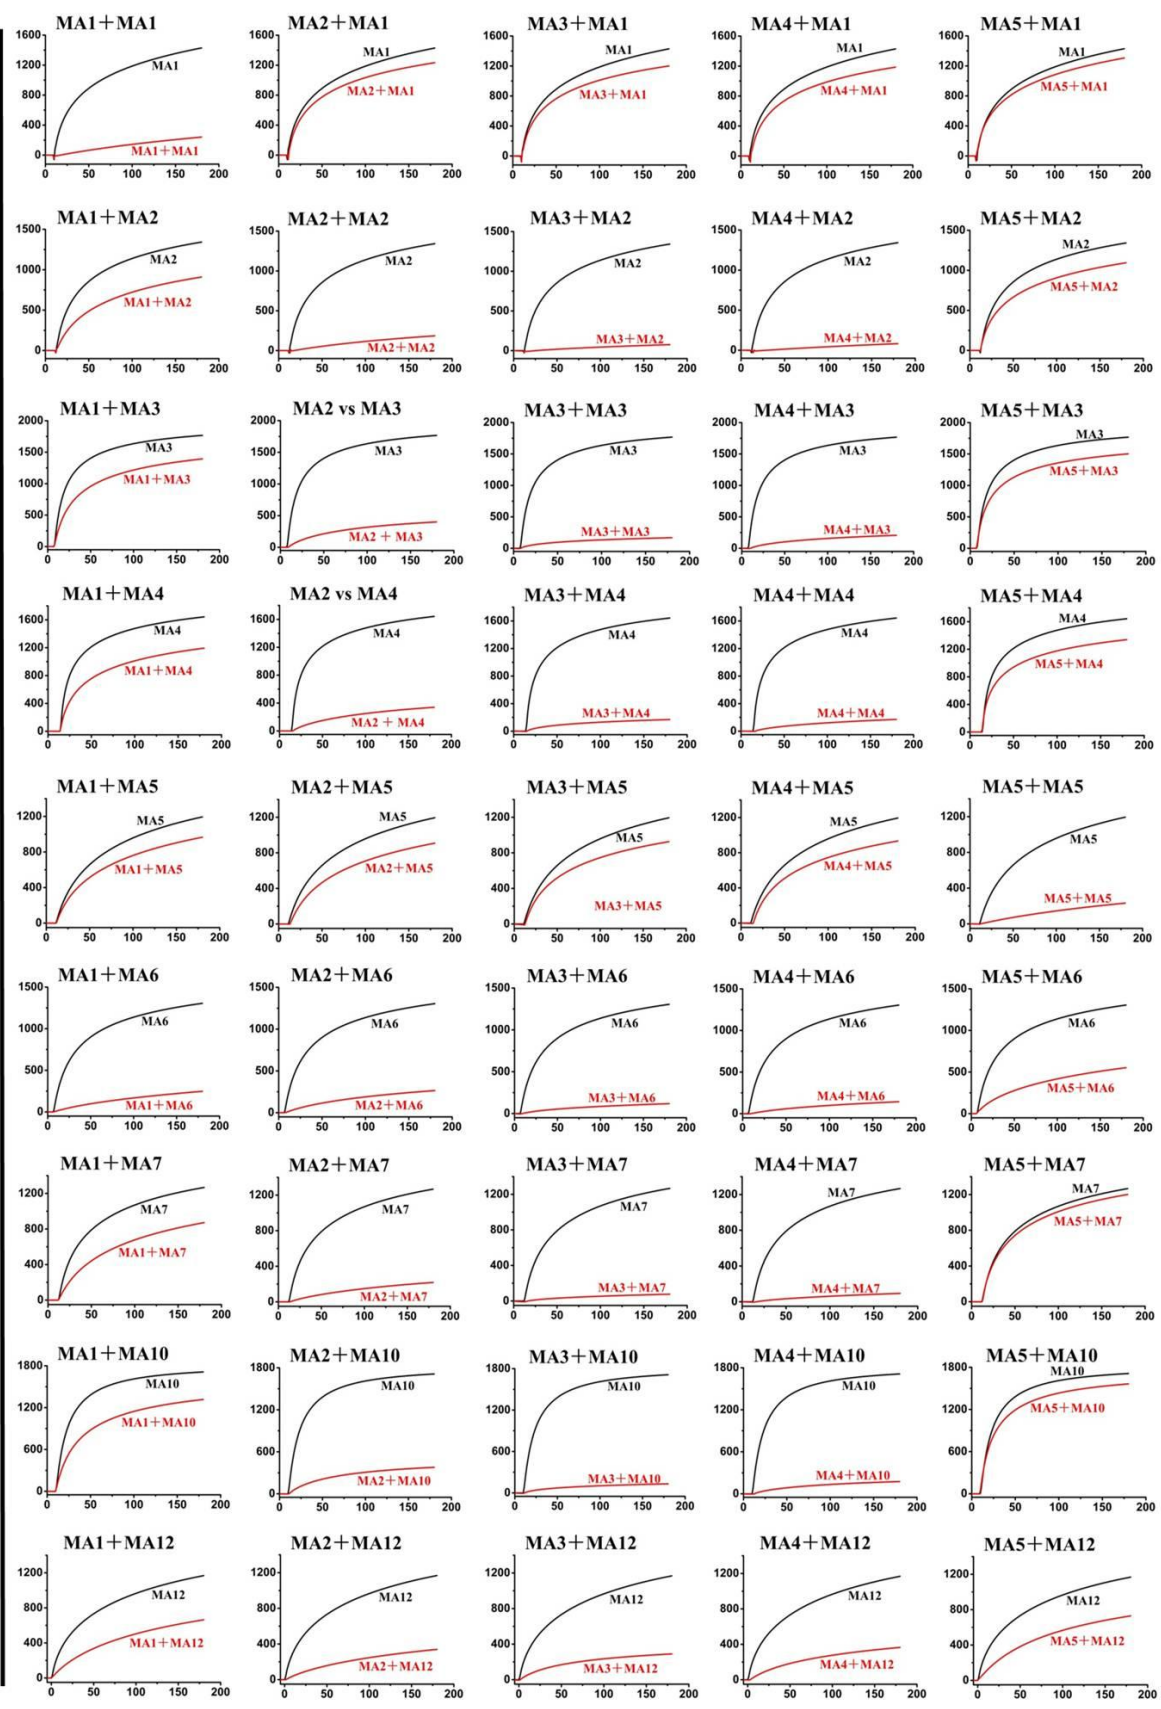**Time (s)**

Response unit (RU)

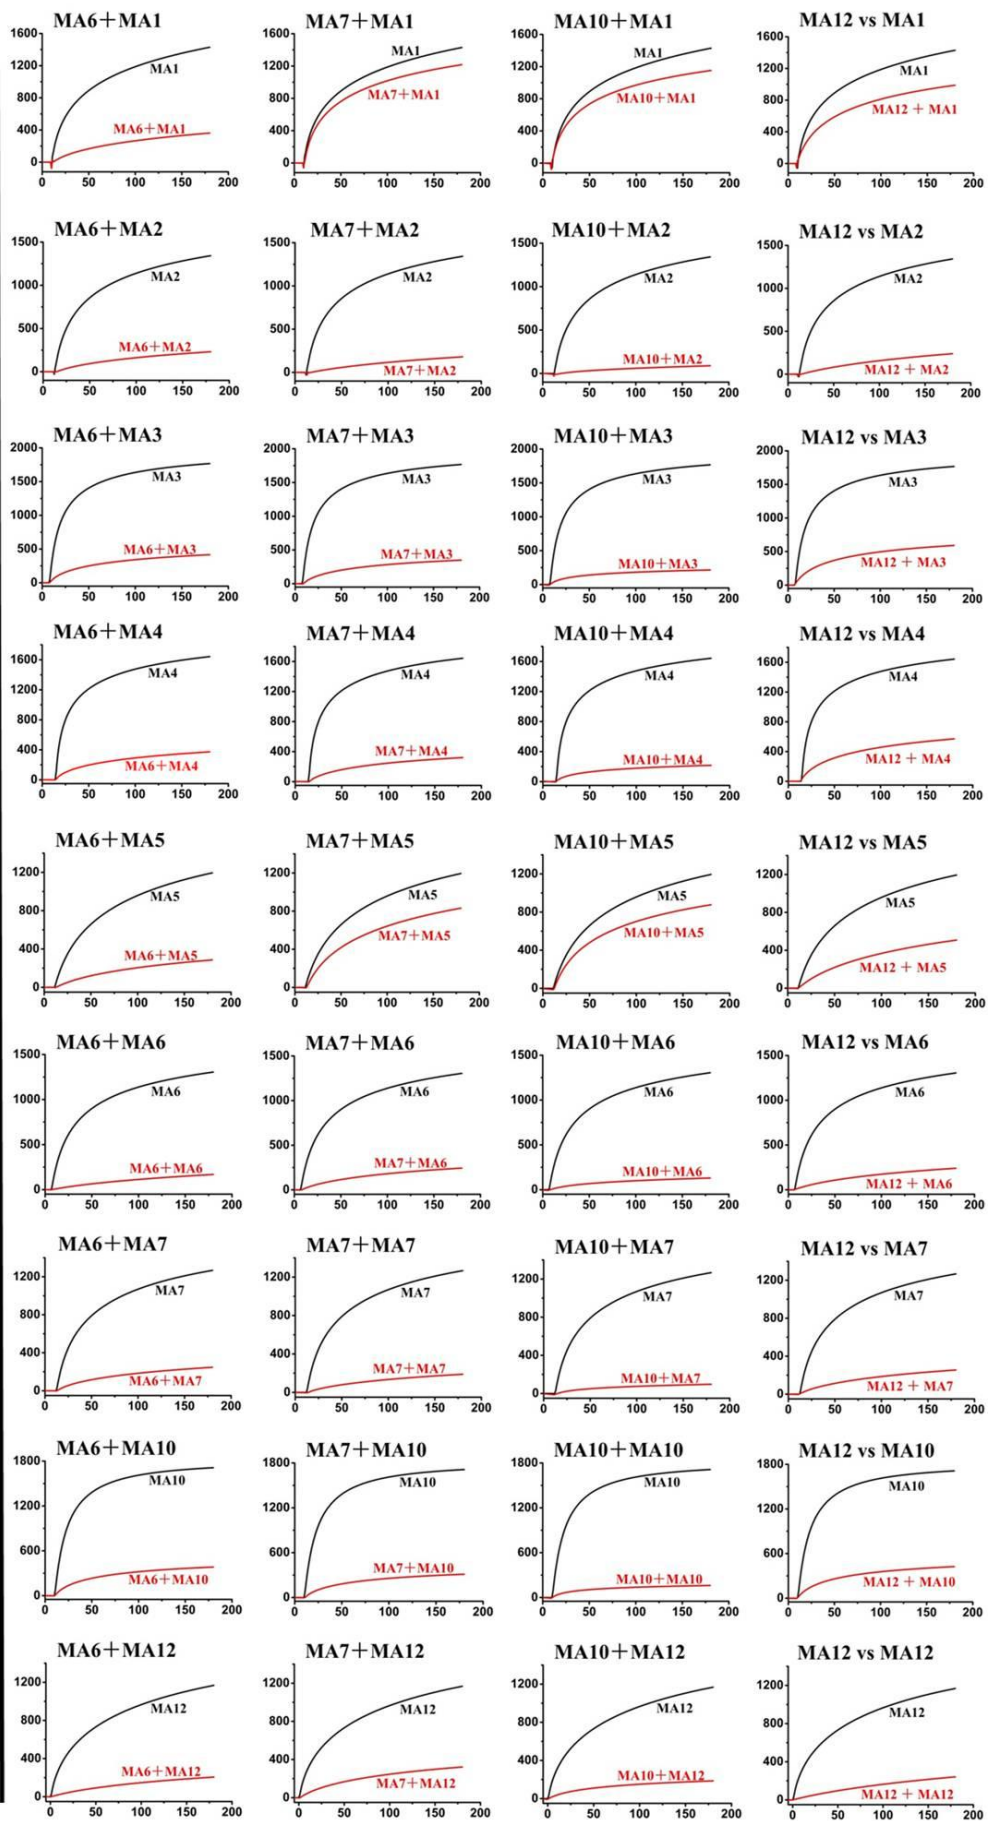

Time (s)

**B**

| mAbs | MA1 | MA2 | MA3 | MA4 | MA5 | MA6 | MA7 | MA10 | MA12 |
|------|-----|-----|-----|-----|-----|-----|-----|------|------|
| MA1  |     | –   | –   | –   | –   | +++ | –   | –    | +    |
| MA2  | –   |     | +++ | +++ | –   | +++ | +++ | ++   | ++   |
| MA3  | –   | +++ |     | +++ | –   | +++ | +++ | +++  | ++   |
| MA4  | –   | +++ | +++ |     | –   | +++ | +++ | +++  | ++   |
| MA5  | –   | –   | –   | –   |     | ++  | –   | –    | +    |
| MA6  | ++  | +++ | +++ | +++ | ++  |     | +++ | ++   | +++  |
| MA7  | –   | +++ | +++ | +++ | –   | +++ |     | +++  | ++   |
| MA10 | –   | +++ | +++ | +++ | –   | +++ | +++ |      | +++  |
| MA12 | –   | +++ | ++  | ++  | +   | +++ | +++ | ++   |      |

**Figure. (S8). Epitope mapping through competitive binding measured by SPR. MA1, MA2, and MA5 bind simultaneously to SARS-CoV-2 RBD<sub>V367F</sub>.** (A) The sensorgrams showed distinct binding patterns when pairs of testing antibodies were sequentially applied to the purified RBD<sub>V367F</sub>, which was covalently immobilized onto a CM5 sensor chip. The level of reduction in RU comparing with or without prior antibody incubation is the key criterion to determine two mAbs that recognize separate or closely situated epitopes. (B) Summary of the abovementioned competition: “+++,” >80% competition; “++,” 50% to 80%; “+,” 25% to 50%; and “–,” <25%. Results in (a) are representatives of two independent experiments.

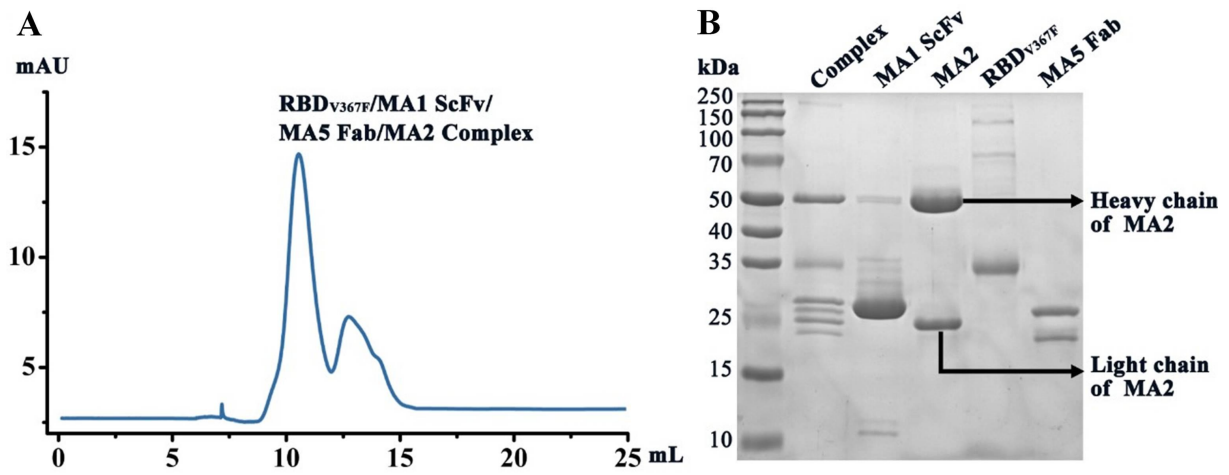

**Fig. (S9).** MA1, MA2 and MA5 bound to RBD<sub>V367F</sub> simultaneously as revealed by the purified RBD<sub>V367F</sub>/MA1scFv/MA2/MA5 Fab complex. The scFv of MA1, Fab of MA5, and full length of MA2 were incubated with recombinant RBD<sub>V367F</sub> for 30 min before running through Superdex 200 column (A), and the peak fractions were concentrated and run on SDS-PAGE (B).



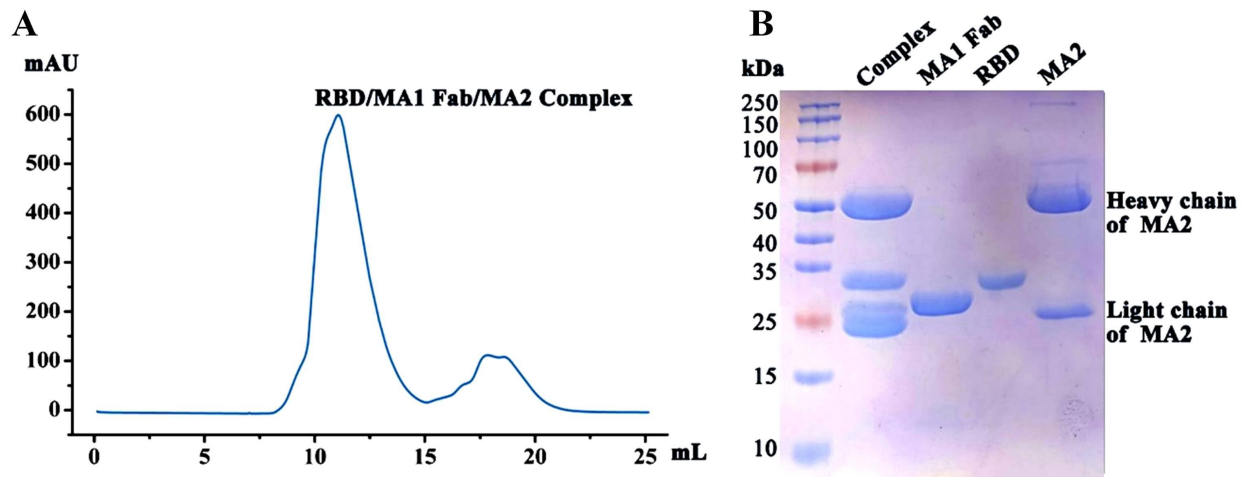

**Fig. (S10).** MA1 and MA2 bound to the RBD simultaneously as revealed by the purified **RBD/MA1 Fab/MA2 complexes**. The Fab of MA1 and full-length MA2 were incubated with recombinant RBD for 30 min before running through Superdex 200 column. The peak fractions were (A) concentrated and (B) run on SDS-PAGE.

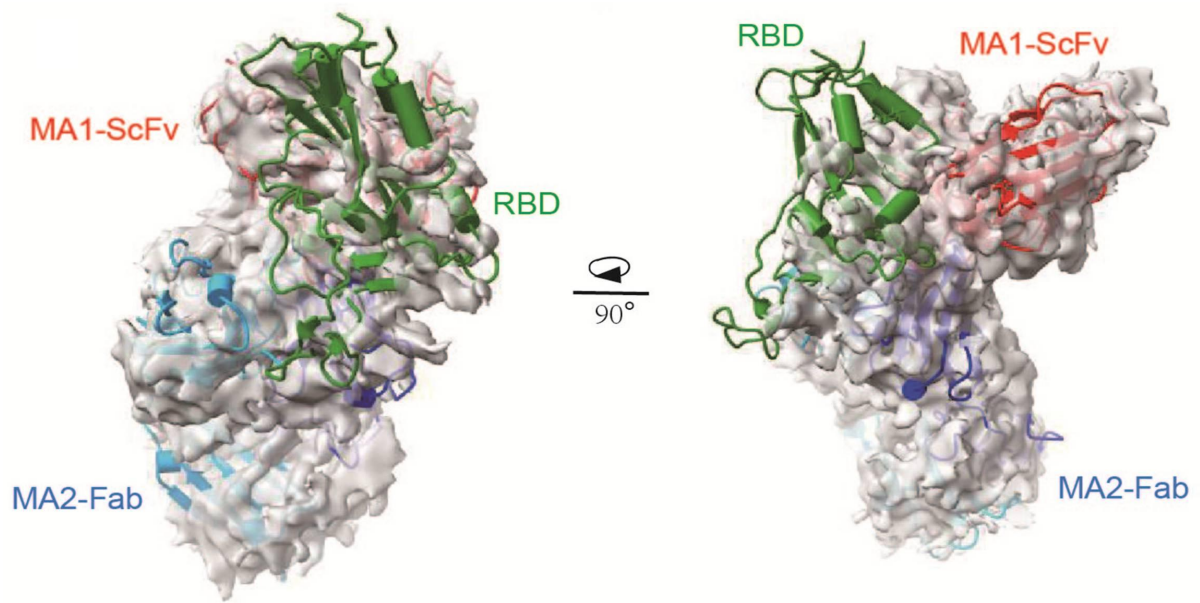

**Fig. (S11).** Cryo-EM structures of MA1ScFv/MA2Fab/RBD complex.

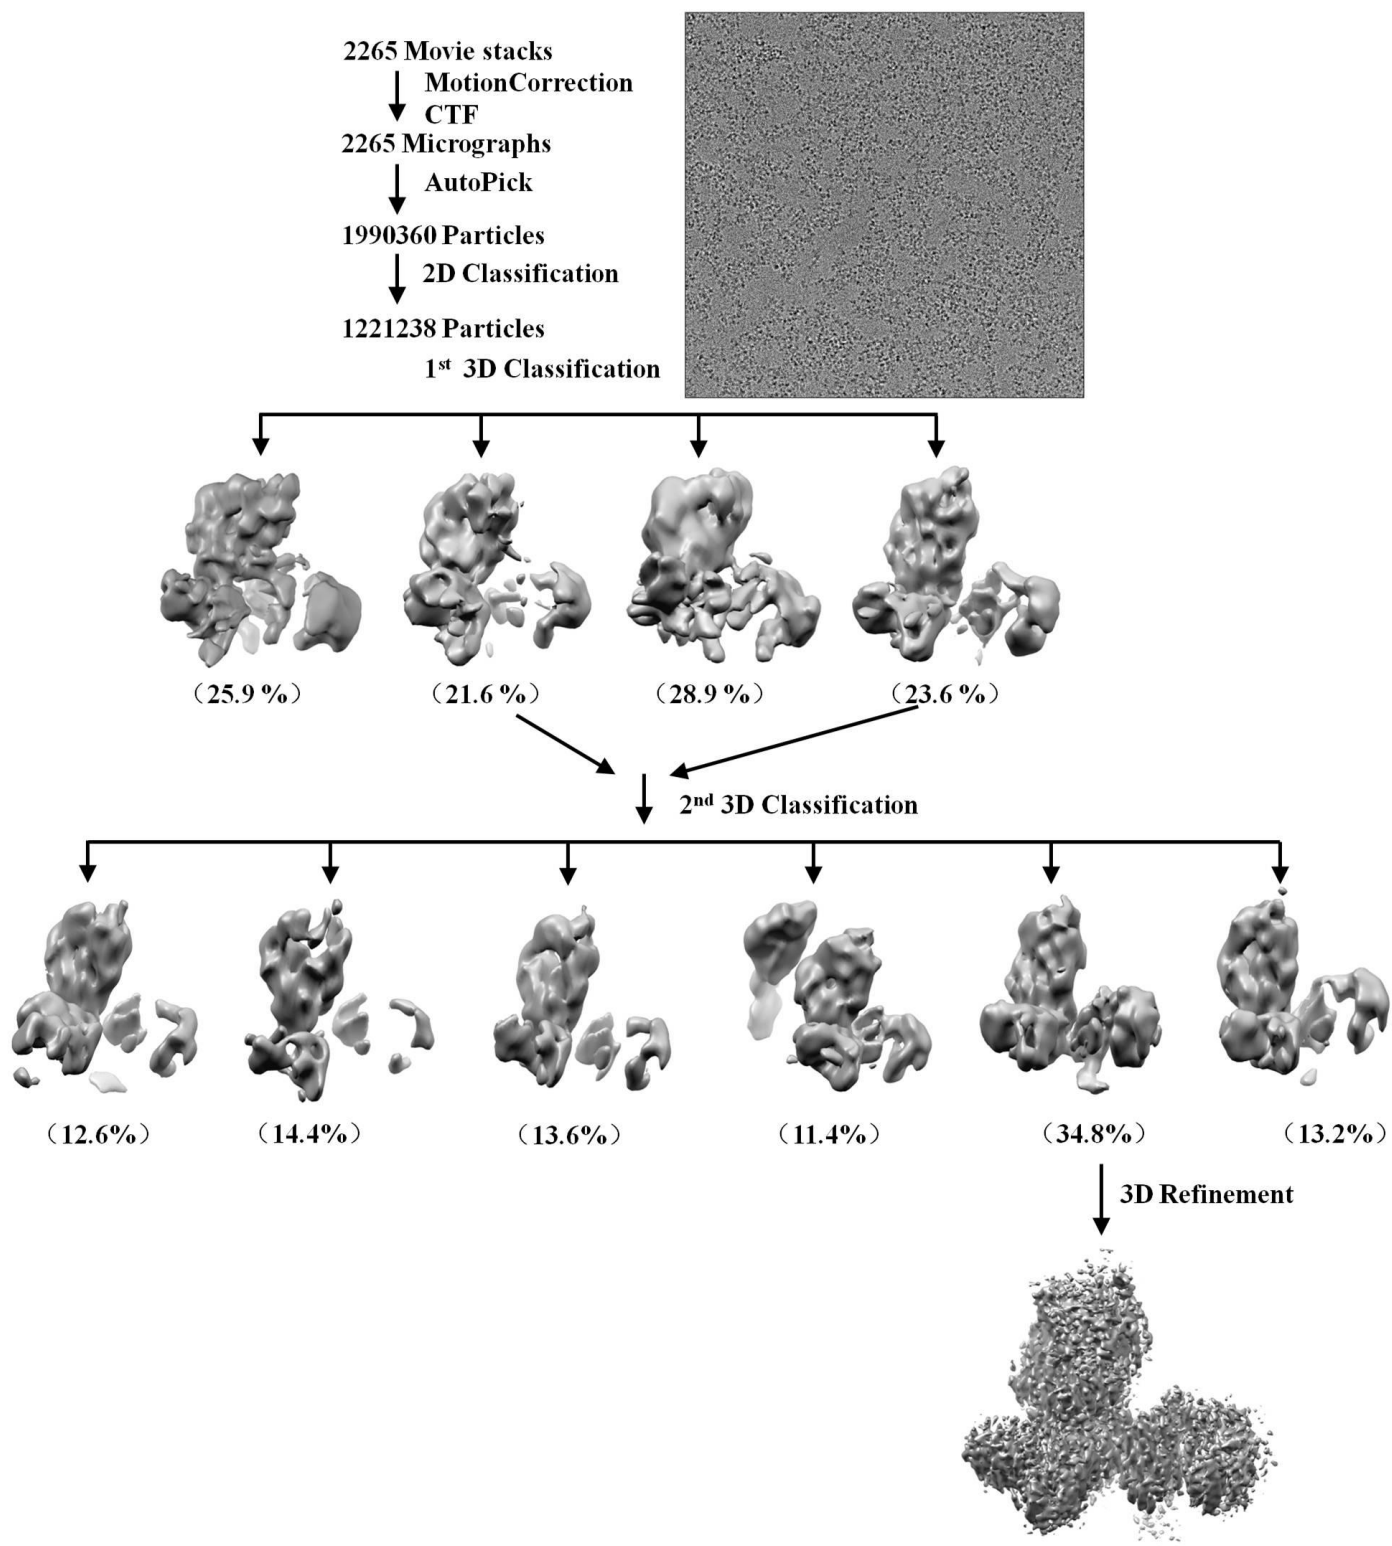

**Fig. (S12).** Flow chart for Cryo-EM data processing of MA1ScFv/MA2Fab/MA5Fab-/RBD<sub>V367F</sub> complex.

**Table. S1. ELISA screening of high-potency ACE2 competition hybridoma clones.**

The first screening identified the hybridoma clones binding to RBD with high affinity, and 74 clones were selected. Competitive ELISA was used to determine the clones that reduced the binding of S to the ACE2 receptor by more than 50% (highlighted).

|    |       | OD450   | OD450      | Inhibition |       |         | OD450      | OD450 | Inhibition |
|----|-------|---------|------------|------------|-------|---------|------------|-------|------------|
|    | Clone | (S-ECD) | (ACE2-hFc) | ratio      | Clone | (S-ECD) | (ACE2-hFc) | ratio |            |
| 1  | 1B2   | 1.450   | 2.460      | -38.67%    | 38    | 14F8    | 0.993      | 2.826 | -59.30%    |
| 2  | 1B7   | 1.326   | 0.933      | 47.41%     | 39    | 15B5    | 1.113      | 3.21  | -80.95%    |
| 3  | 1E9   | 1.296   | 1.516      | 14.54%     | 40    | 19F9    | 1.219      | 1.698 | 4.28%      |
| 4  | 1G10  | 1.398   | 2.362      | -33.15%    | 41    | 20A3    | 1.469      | 2.201 | -24.07%    |
| 5  | 2C11  | 1.336   | 0.834      | 52.99%     | 42    | 20E2    | 1.199      | 1.847 | -4.11%     |
| 6  | 4H10  | 1.482   | 2.302      | -29.76%    | 43    | 20H8    | 1.351      | 0.306 | 82.75%     |
| 7  | 5B5   | 1.482   | 0.17       | 90.42%     | 44    | 21A12   | 1.127      | 1.808 | -1.92%     |
| 8  | 5B6   | 1.343   | 0.143      | 91.94%     | 45    | 23C9    | 0.997      | 0.426 | 75.99%     |
| 9  | 5F11  | 1.407   | 0.852      | 51.97%     | 46    | 24E2    | 1.063      | 2.436 | -37.32%    |
| 10 | 5F12  | 1.437   | 2.454      | -38.33%    | 47    | 24H10   | 1.160      | 1.867 | -5.24%     |
| 11 | 6F4   | 1.420   | 1.762      | 0.68%      | 48    | 24H11   | 1.192      | 0.361 | 79.65%     |
| 12 | 6G3   | 1.491   | 2.42       | -36.41%    | 49    | 25E4    | 0.916      | 1.761 | 0.73%      |
| 13 | 7C12  | 1.348   | 1.597      | 9.98%      | 50    | 26H8    | 0.960      | 0.533 | 69.95%     |
| 14 | 7D3   | 1.331   | 2.882      | -62.46%    | 51    | 27A2    | 0.941      | 2.788 | -57.16%    |
| 15 | 7E3   | 1.477   | 1.602      | 9.70%      | 52    | 29C1    | 0.993      | 1.221 | 31.17%     |
| 16 | 7F1   | 1.451   | 0.504      | 71.59%     | 53    | 29E2    | 0.932      | 1.489 | 16.07%     |
| 17 | 7F8   | 1.257   | 2.928      | -65.05%    | 54    | 29H7    | 1.032      | 1.234 | 30.44%     |
| 18 | 8A2   | 1.371   | 1.166      | 34.27%     | 55    | 30A7    | 0.912      | 2.822 | -59.08%    |
| 19 | 8B6   | 1.306   | 0.872      | 48.85%     | 56    | 30F6    | 1.024      | 1.225 | 30.95%     |
| 20 | 8D8   | 1.360   | 1.823      | -2.76%     | 57    | 32F1    | 1.079      | 1.158 | 34.72%     |
| 21 | 9A1   | 1.572   | 1.54       | 13.19%     | 58    | 34A12   | 1.069      | 2.314 | -30.44%    |
| 22 | 9A4   | 1.316   | 1.923      | -8.40%     | 59    | 34D1    | 1.536      | 1.555 | 12.34%     |
| 23 | 9A10  | 1.347   | 1.303      | 26.55%     | 60    | 34G1    | 1.267      | 2.741 | 2.741      |
| 24 | 9B4   | 1.324   | 2.806      | -58.17%    | 61    | 35B4    | 1.257      | 1.337 | 24.63%     |
| 25 | 9B6   | 1.609   | 0.093      | 94.76%     | 62    | 36A12   | 1.318      | 1.522 | 14.21%     |
| 26 | 9C10  | 1.394   | 3.3        | -86.02%    | 63    | 36F5    | 1.536      | 1.147 | 35.34%     |
| 27 | 9C12  | 1.413   | 0.152      | 91.43%     | 64    | 36G1    | 1.331      | 1.008 | 43.18%     |
| 28 | 9D2   | 1.339   | 3.148      | -77.45%    | 65    | 37B3    | 1.274      | 0.419 | 76.38%     |
| 29 | 9D10  | 1.298   | 2.021      | -13.92%    | 66    | 37C10   | 1.267      | 1.432 | 19.28%     |
| 30 | 9E10  | 1.493   | 1.11       | 37.43%     | 67    | 37F2    | 1.334      | 1.365 | 23.06%     |
| 31 | 10A1  | 1.331   | 1.933      | -8.96%     | 68    | 37H4    | 1.502      | 0.112 | 93.69%     |
| 32 | 10D10 | 1.378   | 1.966      | -10.82%    | 69    | 38B2    | 1.607      | 1.029 | 42.00%     |
| 33 | 10E6  | 1.260   | 1.345      | 24.18%     | 70    | 38B6    | 1.522      | 0.814 | 54.11%     |
| 34 | 12C2  | 1.749   | 2.990      | -68.55%    | 71    | 38F11   | 1.254      | 1.029 | 42.00%     |
| 35 | 12G3  | 1.296   | 0.806      | 54.57%     | 72    | 39D11   | 1.348      | 0.814 | 54.11%     |
| 36 | 13A1  | 1.549   | 0.245      | 86.19%     | 73    | 40C5    | 1.370      | 1.827 | -2.99%     |
| 37 | 13C3  | 0.943   | 2.641      | -48.87%    | 74    | 40H4    | 1.779      | 2.811 | -58.46%    |

**Table. S2. Binding capacity and neutralizing activity analysis of 17 monoclonal Abs.**

| mAbs | Binding to RBD |           | Binding to           | SARS-CoV2        | SARS-CoV2        |                  | SARS-CoV2(V367F) |                  | ELISA RBD        |
|------|----------------|-----------|----------------------|------------------|------------------|------------------|------------------|------------------|------------------|
|      | K <sub>D</sub> | Competing | RBD <sub>V367F</sub> | Live virus       | Pseudovirus      |                  | Pseudovirus      |                  | His Blocking     |
|      |                |           | K <sub>D</sub>       | IC <sub>50</sub> | IC <sub>50</sub> | IC <sub>80</sub> | IC <sub>50</sub> | IC <sub>80</sub> | IC <sub>50</sub> |
| (nM) | w/ACE2         | (nM)      | (nM)                 | (nM)             | (nM)             | (nM)             | (nM)             | (nM)             | (nM)             |
| MA1  | 0.45           | +++       | 0.23                 | 0.057            | 0.091            | 0.24             | 0.78             | 1.36             | 3.25             |
| MA2  | 0.51           | +++       | 1.68                 | 0.099            | 0.083            | 0.13             | 0.23             | 0.91             | 2.56             |
| MA3  | 0.58           | ++        | 0.54                 | 0.158            | 0.17             | 0.57             | 0.063            | 0.11             | 1.24             |
| MA4  | 0.71           | +++       | 0.75                 | n.d.             | 0.41             | 1.06             | 0.25             | 0.59             | 1.66             |
| MA5  | 1.31           | +++       | 4.42                 | 0.306            | 1.84             | 9.20             | 3.54             | 5.73             | 3.50             |
| MA6  | 0.26           | +++       | 0.034                | 0.169            | 0.10             | 0.50             | 0.36             | 0.64             | 1.93             |
| MA7  | 0.67           | +++       | 0.87                 | 0.198            | 0.47             | 0.35             | 0.042            | 0.10             | 2.53             |
| MA8  | 1.24           | +++       | 0.84                 | 0.034            | 0.47             | 0.94             | 0.039            | 0.15             | 2.19             |
| MA9  | 1.51           | +++       | 6.69                 | 0.093            | n.d.             | n.d.             | n.d.             | n.d.             | 5.67             |
| MA10 | 1.11           | ++        | 0.75                 | 0.088            | 0.11             | 0.34             | 0.084            | 0.14             | 4.10             |
| MA11 | 31.2           | ++        | 19.8                 | n.d.             | 1.63             | 5.12             | 0.59             | 2.58             | 4.48             |
| MA12 | 5.60           | +++       | 3.48                 | n.d.             | 0.34             | 2.69             | 1.11             | 3.07             | 1.52             |
| MA13 | 18.56          | +         | 15.2                 | n.d.             | n.d.             | n.d.             | n.d.             | n.d.             | 11.13            |
| MA14 | 19.32          | +         | 5.78                 | n.d.             | n.d.             | n.d.             | n.d.             | n.d.             | 4.91             |
| MA15 | 260            | -         | 172                  | n.d.             | 0.41             | 1.18             | 0.67             | 3.01             | 1.70             |
| MA16 | 77.0           | +         | 26.6                 | n.d.             | 1.27             | 14.67            | 7.90             | 19.58            | 2.90             |
| MA17 | 36.5           | ++        | 22.7                 | n.d.             | n.d.             | n.d.             | n.d.             | n.d.             | 3.14             |

mAb binding to RBD or RBD<sub>V367F</sub> was presented by K<sub>D</sub>: “+++,” >80% competition with ACE2; “+,” 50% to 80%; “+,” 20% to 50%; and “-,” <20%. IC<sub>50</sub> represents the half-maximal concentration, whereas IC<sub>80</sub> is the 80% inhibitory concentration in the pseudovirus neutralization assay. N.d., not done.

**Table. S3. Reactivities of RBD-specific mAbs against reduced and unreduced RBDs.**

| mAbs | RBD-Fc | Reduced RBD-Fc |
|------|--------|----------------|
| MA3  | 2.728  | 0.081          |
| MA16 | 2.592  | 0.133          |
| MA10 | 2.545  | 0.055          |
| MA6  | 2.917  | 0.057          |
| MA11 | 2.730  | 0.055          |
| MA7  | 2.535  | 0.069          |
| MA12 | 2.860  | 0.076          |
| MA15 | 3.054  | 0.068          |
| MA2  | 2.667  | 0.056          |
| MA14 | 2.555  | 0.062          |
| MA5  | 2.678  | 0.071          |
| MA8  | 2.592  | 0.063          |
| MA1  | 2.626  | 0.060          |
| MA17 | 2.705  | 0.071          |
| MA13 | 2.383  | 0.053          |
| MA9  | 2.763  | 0.058          |
